# Supplementary material
Source: Springer Nature journal article supplement (https://www.springermedizin.de/resource/supplementary/12865_2010_327_MOESM3_ESM.pdf/9427760)

A)

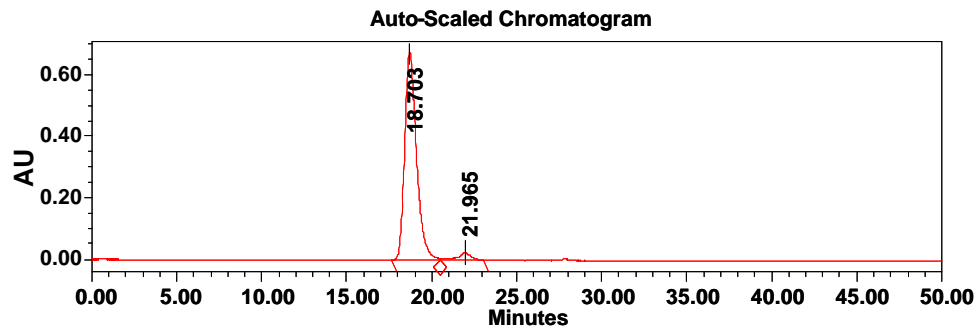

|   | Processed Channel | Retention Time (min) | Area     | % Area | Height  |
|---|-------------------|----------------------|----------|--------|---------|
| 1 | PDA 214.0nm       | 18.703               | 32438683 | 96.31  | 1675622 |
| 2 | PDA 214.0nm       | 21.965               | 1244071  | 3.69   | 22751   |

B)

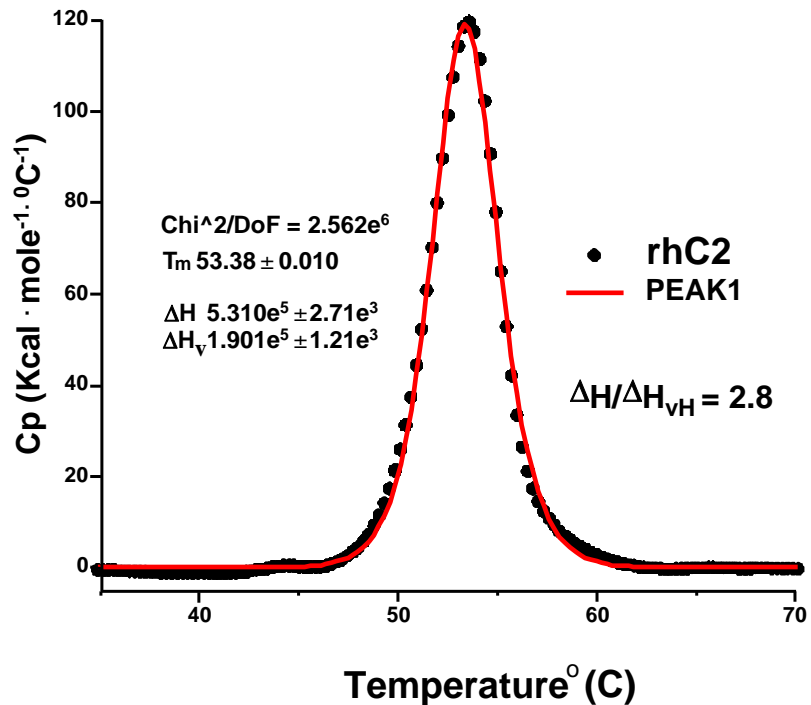

Supplement: MOESM3 [file 9427760]
